# Supplementary material for: Nb2C MXene-Functionalized Scaffolds Enables Osteosarcoma Phototherapy and Angiogenesis/Osteogenesis of Bone Defects
Source: PubMed Central journal article supplement (PMC8187678; doi:10.1007/s40820-020-00547-6), 2021-01-04
Supplement: 40820_2020_547_MOESM1_ESM.pdf [file 40820_2020_547_MOESM1_ESM.pdf]

Supporting Information for

## **Nb<sub>2</sub>C MXene-Functionalized Scaffolds Enables Osteosarcoma**

### **Phototherapy and Angiogenesis/Osteogenesis of Bone Defects**

Junhui Yin<sup>1, 4, #</sup>, Shanshan Pan<sup>2, 3, #</sup>, Xiang Guo<sup>5</sup>, Youshui Gao<sup>4</sup>, Daoyu Zhu<sup>4</sup>, Qianhao Yang<sup>4</sup>, Junjie Gao<sup>4, \*</sup>, Changqing Zhang<sup>1, 4, \*</sup>, Yu Chen<sup>2, 3, \*</sup>

<sup>1</sup>Institute of Microsurgery on Extremities, Shanghai Jiao Tong University Affiliated Sixth People's Hospital, Shanghai 200233, People's Republic of China

<sup>2</sup>School of Life Sciences, Shanghai University, Shanghai 200444, People's Republic of China

<sup>3</sup>State Key Laboratory of High Performance Ceramics and Superfine Microstructure, Shanghai Institute of Ceramics, Chinese Academy of Sciences, Shanghai 200050, People's Republic of China

<sup>4</sup>Department of Orthopaedic Surgery, Shanghai Jiao Tong University Affiliated Sixth People's Hospital, Shanghai 200233, People's Republic of China

<sup>5</sup>Department of Orthopedics, The Second affiliated Hospital, The Navy Medical University, Shanghai 200003, People's Republic of China

#Junhui Yin and Shanshan Pan contribute equally to this work

\*Corresponding authors. E-mail: [colingjj@163.com](mailto:colingjj@163.com) (J. Gao); [zhangcq@sjtu.edu.cn](mailto:zhangcq@sjtu.edu.cn) (C. Zhang); [chenyuedu@shu.edu.cn](mailto:chenyuedu@shu.edu.cn) (Y. Chen)

## Supplementary Figures

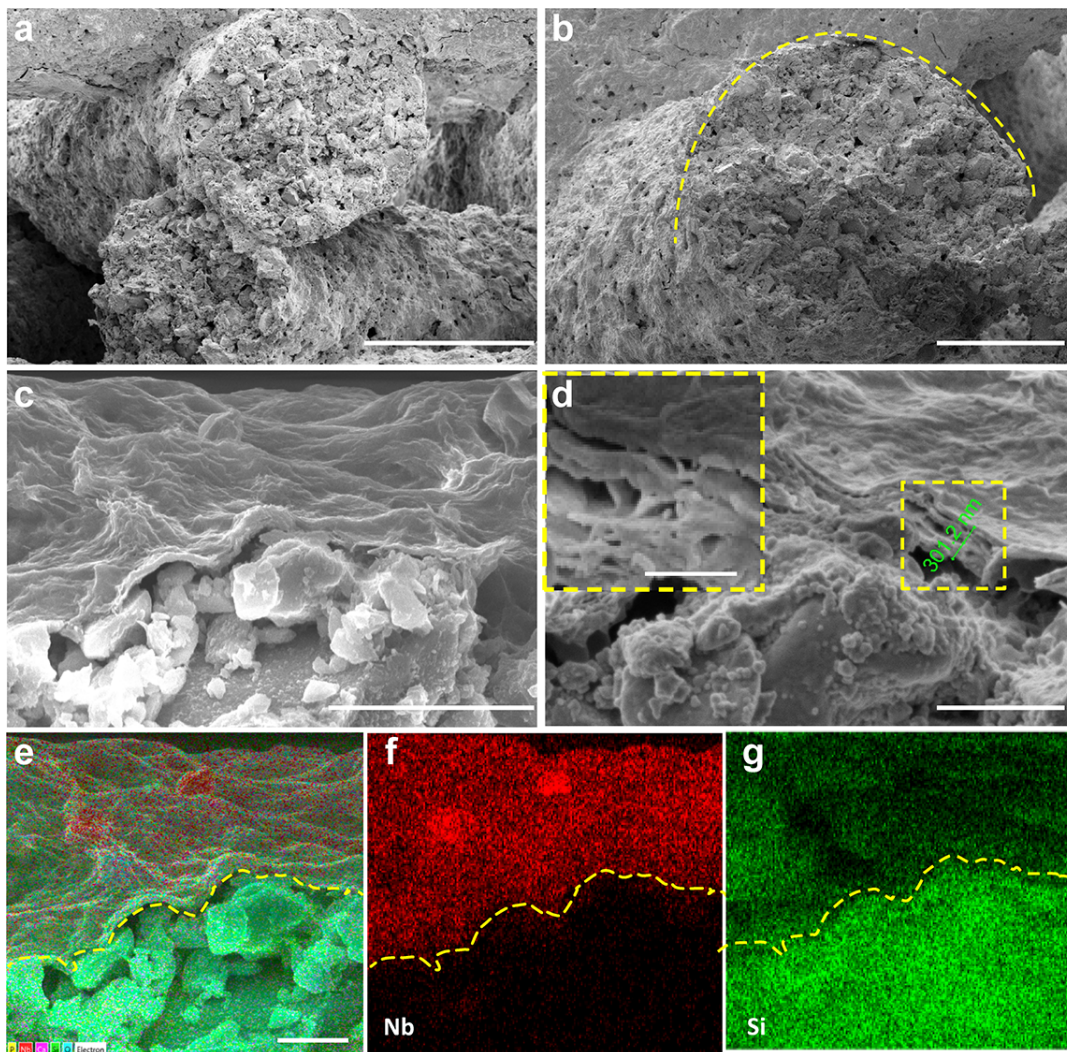

**Fig. S1** **a, b** SEM images of cross section of 1.0 NBGS. Scale bars in plane **a** and **b** are 200 and 100  $\mu\text{m}$ , respectively. **c, d** Enlarged interfacial SEM images in the presence of 2D Nb<sub>2</sub>C MXene NSs shell (thickness  $\approx$  300 nm) and BGS core in 1.0 NBGS. Scale bar in plane **c, d** and the inset picture are 5  $\mu\text{m}$ , 1  $\mu\text{m}$ , and 100 nm, respectively. **e** Element distribution of fractured surface in NBGS. **f, g** Corresponding element mapping with **e** of Nb and Si in NBGS. All scale bars in plane **e-g** are 2  $\mu\text{m}$

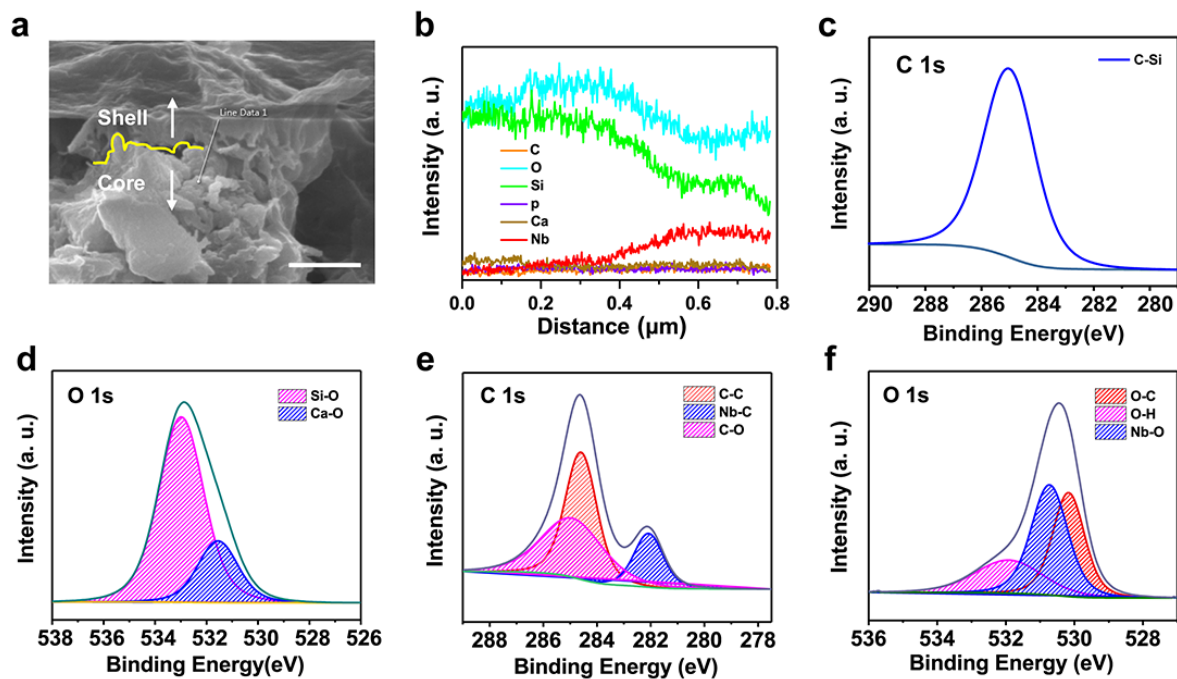

**Fig. S2** **a** SEM image of core-shell structure in the cross section of 1.0 NBGS. Scale bar equals 1  $\mu\text{m}$ . **b** Corresponding element distribution trend of NBGS in plane a. **c**, **d** XPS survey of C 1s and O 1s in BGS. **e**, **f** XPS survey of C 1s and O 1s in NBGS

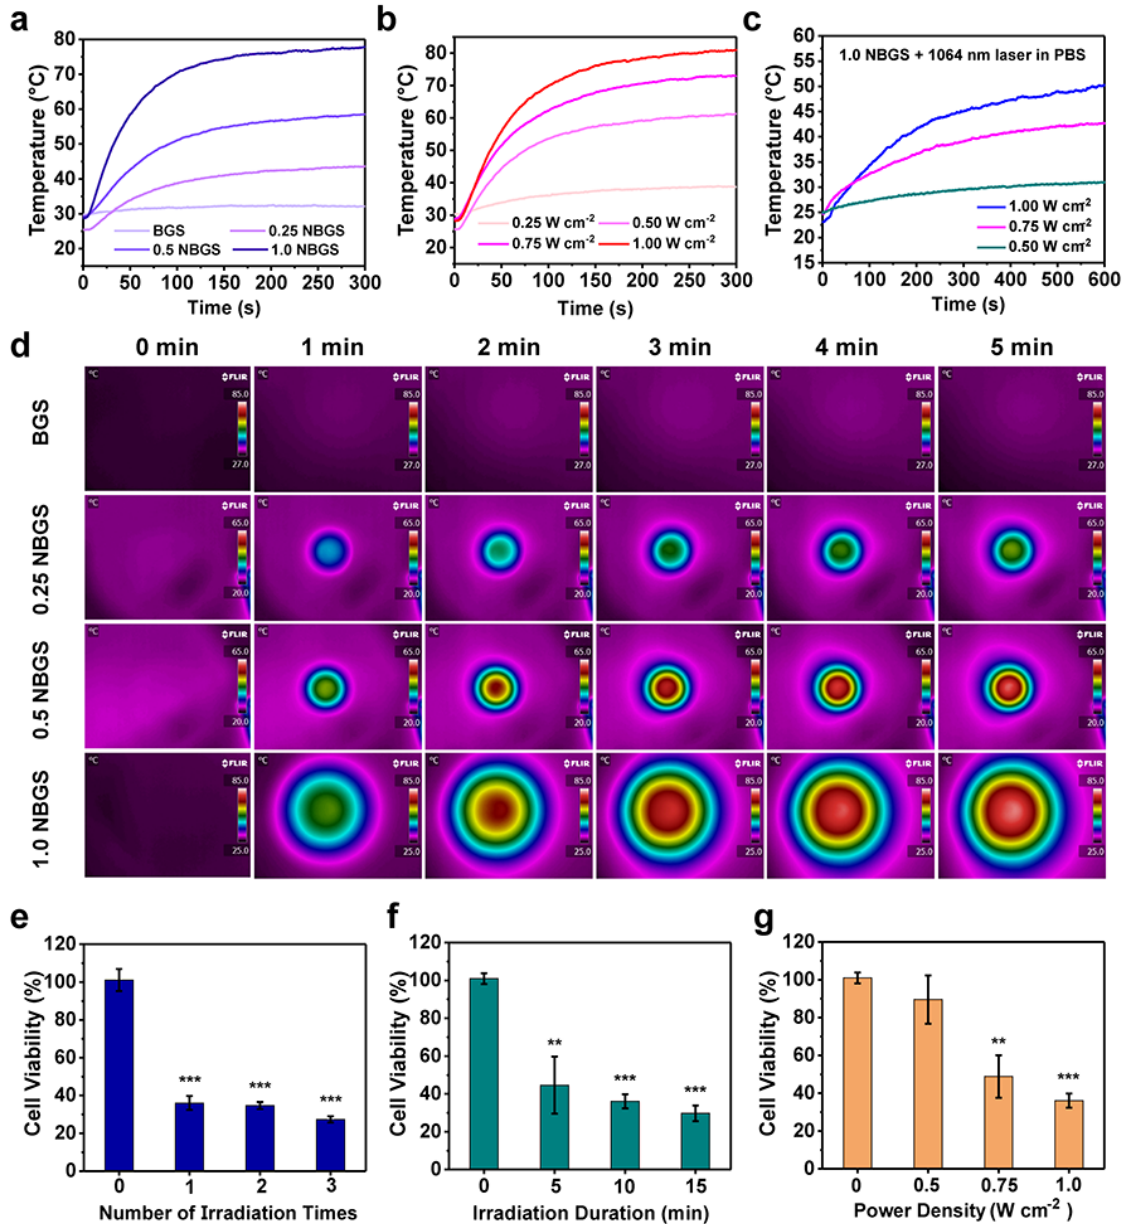

**Fig. S3** **a** Temperature-change curves of BGS, 0.25 NBGS, 0.5 NBGS and 1.0 NBGS ( $1 \text{ W cm}^{-2}$ , 5 min, in air). **b** Photothermal-heating curves of 1.0 NBGS under 1064 nm laser irradiation at the power densities of 0.25, 0.5, 0.75, and  $1.0 \text{ W cm}^{-2}$  (5 min, in air). **c** Temperature-change curves of 1.0 NBGS under 1064 nm laser irradiation at the power densities of 0.5, 0.75, and  $1.0 \text{ W cm}^{-2}$  (10 min, in PBS). **d** Photographs and IR thermal images of BGS, 0.25 NBGS, 0.5 NBGS and 1.0 NBGS under 1064 nm laser irradiation ( $1.0 \text{ W cm}^{-2}$ , in air). **e** Relative cell viability of 1.0 NBGS under various irradiation durations ( $1.0 \text{ W cm}^{-2}$ , 10 min, in  $200 \mu\text{L}$  DMEM). **f** Relative cell viability of 1.0 NBGS under different irradiation durations ( $1.0 \text{ W cm}^{-2}$ , in  $200 \mu\text{L}$  DMEM). **(g)** Relative cell viability of 1.0 NBGS under gradient irradiation densities from 0 to  $1.0 \text{ W cm}^{-2}$  (10 min, in  $200 \mu\text{L}$  DMEM)

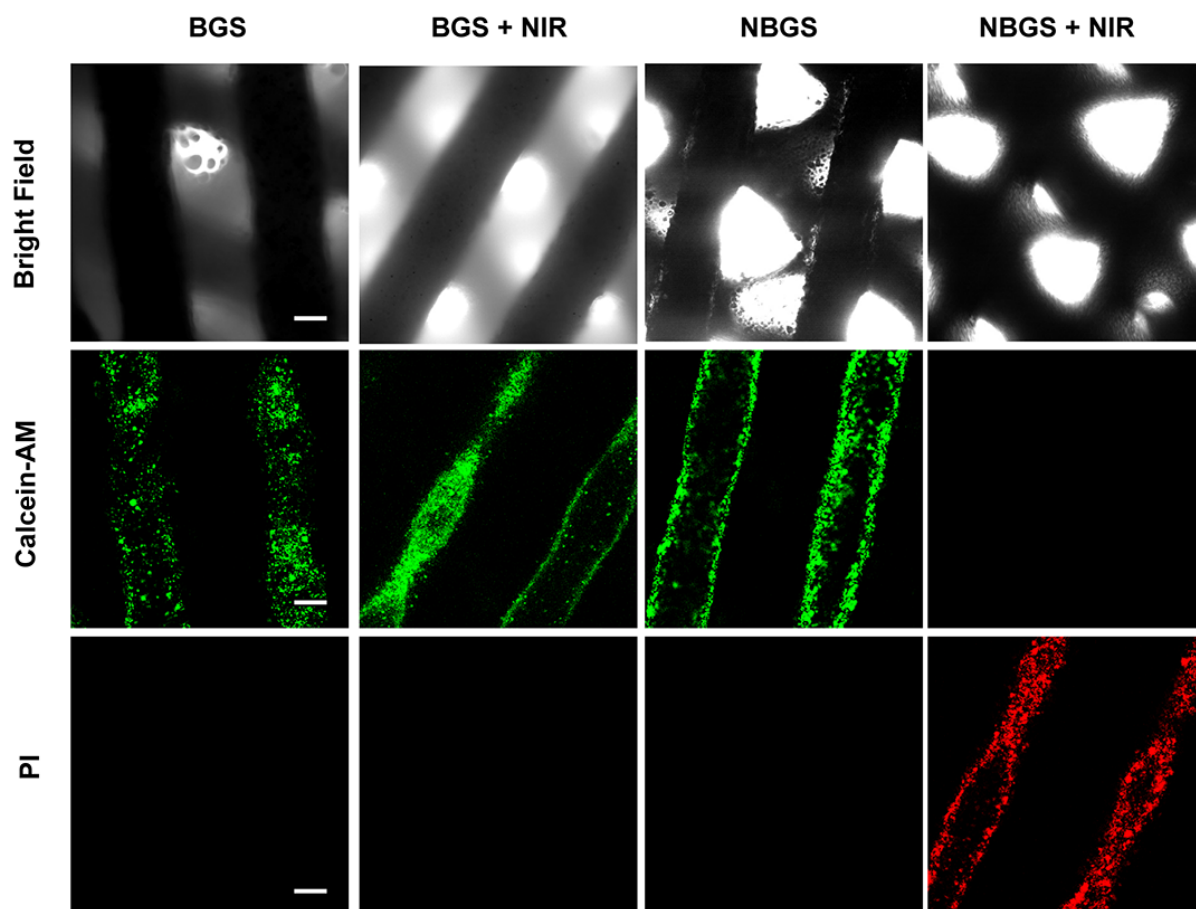

**Fig. S4** CLSM images of BGS, BGS + NIR, NBGS and NBGS + NIR groups including bright field images, calcein-AM (living)/PI (dead) co-staining images. The scale bar is 200  $\mu\text{m}$ . These images are the CLSM images in Fig. 3c with detailed information



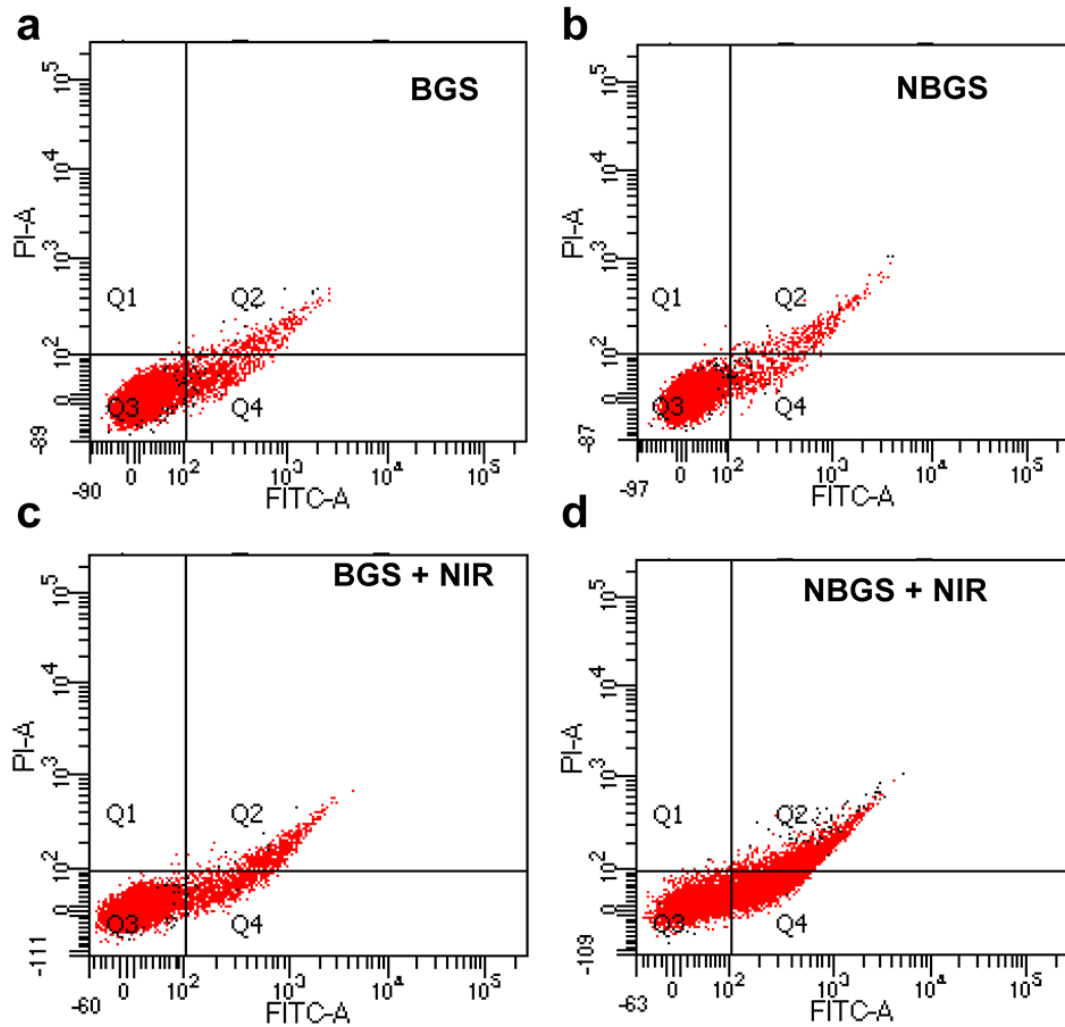

**Fig. S5** Flow cytometry assay of Saos-2 cells on BGS/NBGS. Region Q1, Q2, Q3, and Q4 represents dead cells, late apoptotic cells, live cells and early apoptotic cells, respectively. **a** In BGS group, the percentages of cells in region Q1, Q2, Q3, and Q4 are 0.0%, 3.1%, 90%, and 6.8%, respectively. **b** In NBGS group, the percentages of cells in Q1, Q2, Q3, and Q4 are 0.0%, 3.3%, 92.8% and 3.9%, respectively. **c** In BGS + NIR group, cell distributions in area Q1, Q2, Q3, and Q4 are 0.0%, 5.0%, 87.2%, and 7.8%, respectively. **d** In NBGS + NIR group, the percentages are 0.2%, 16.3%, 49.2%, and 34.3% in Q1, Q2, Q3, and Q4, respectively

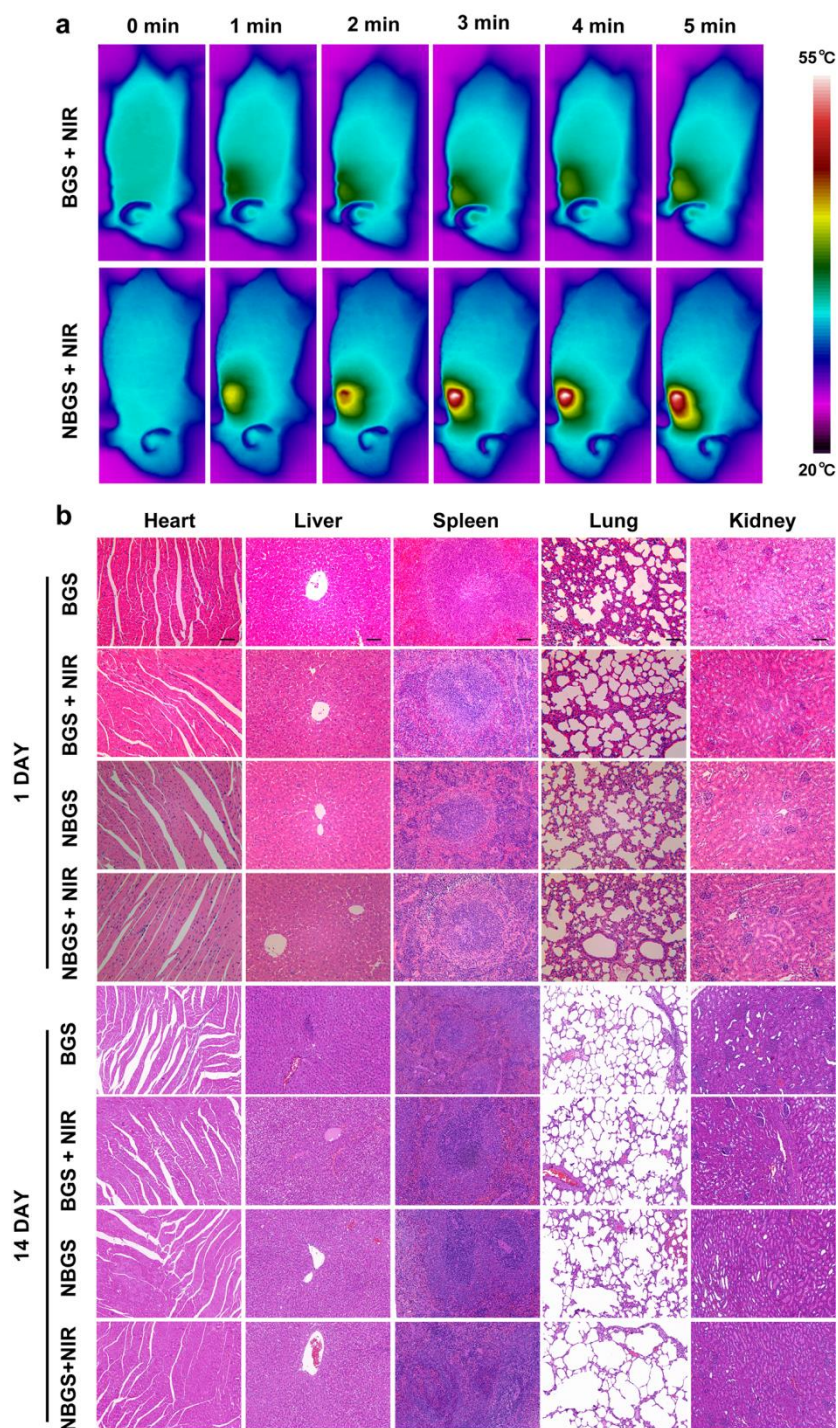

**Fig. S6 a** IR thermal images of tumor-bearing mice implanted with BGS and NBGS exposed to 1064 nm laser ( $1.0 \text{ W cm}^{-2}$ , 5 min). **b** H&E staining of major organs at the 1<sup>th</sup> and 14<sup>th</sup> day after NIR laser irradiation. Scale bar represents 100  $\mu\text{m}$



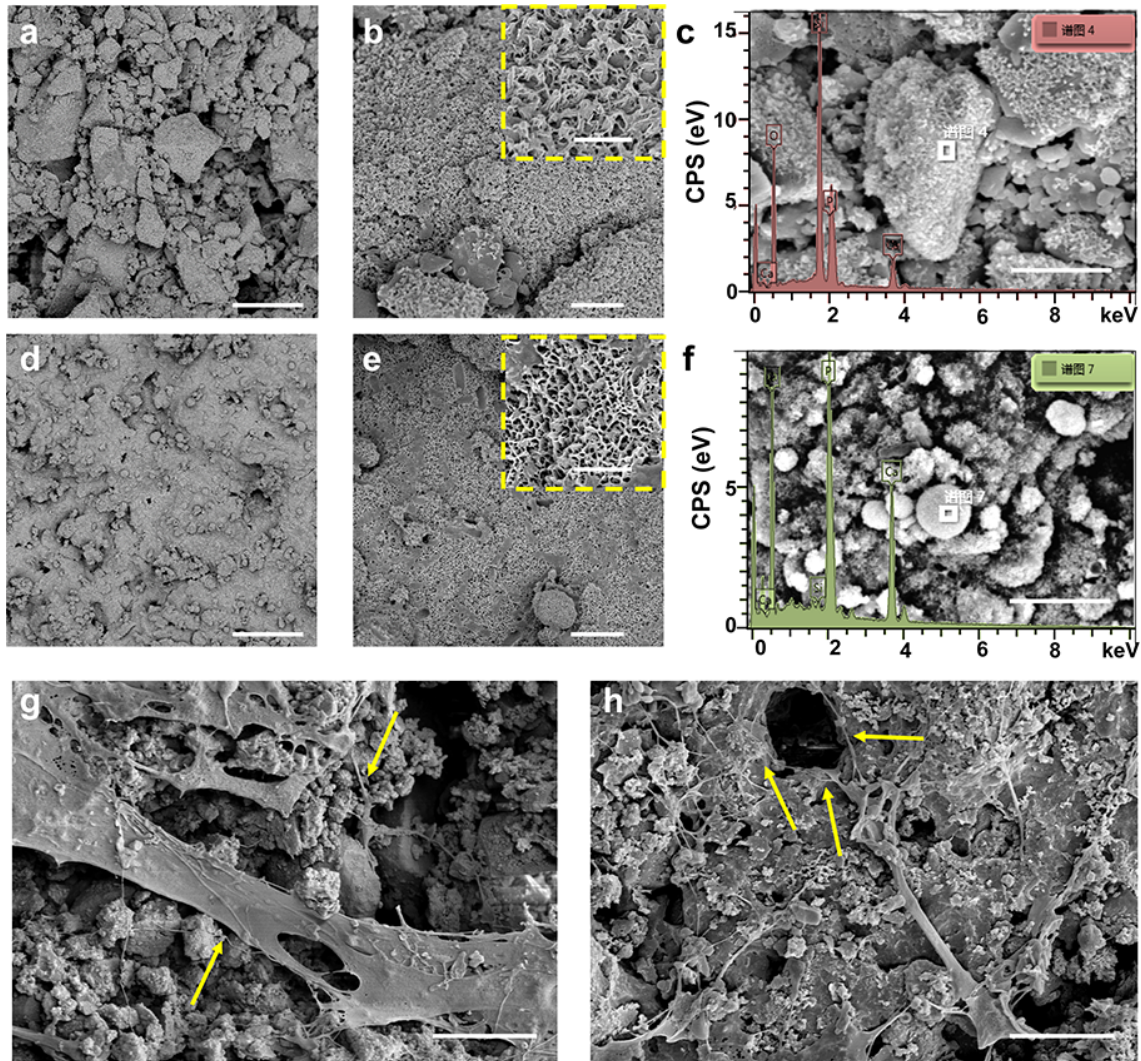

**Fig. S7** **a-c** SEM images and EDS of BGS after being soaked in SBF for 1 day. The atomic contents of O, Si, P and Ca elements in the surface of BGS soaked in SBF are 59.84%, 27.61%, 5.58%, and 6.97%, respectively, and the Ca/P ratio approximately equals 1.25. The scale bar in plane **a**, **b**, **c** and inset is 20, 3, 5, and 1  $\mu\text{m}$ , respectively. **d-f** SEM images and EDS of NBGS after soaked in SBF for 1 day. The atomic contents of O, Si, P and Ca elements in the surface of BGS soaked in SBF are 69.88%, 0.40%, 11.77%, and 17.95%, respectively. The ratio of Ca/P approximately equals 1.53. Scale bar in plane **d**, **e**, **f** and inset is 20, 3, 5, and 1  $\mu\text{m}$ , respectively. **g** SEM image of hBMSCs in BGS after co-incubated for 1 day. Yellow arrows indicate extended pseudopods penetrating into 3D interconnected macropores of scaffolds. **h** SEM image of hBMSCs in NBGS after co-incubated for 1 day. Yellow arrows point out pseudopods. Scale bar in plane **g** and **h** is 5  $\mu\text{m}$ .



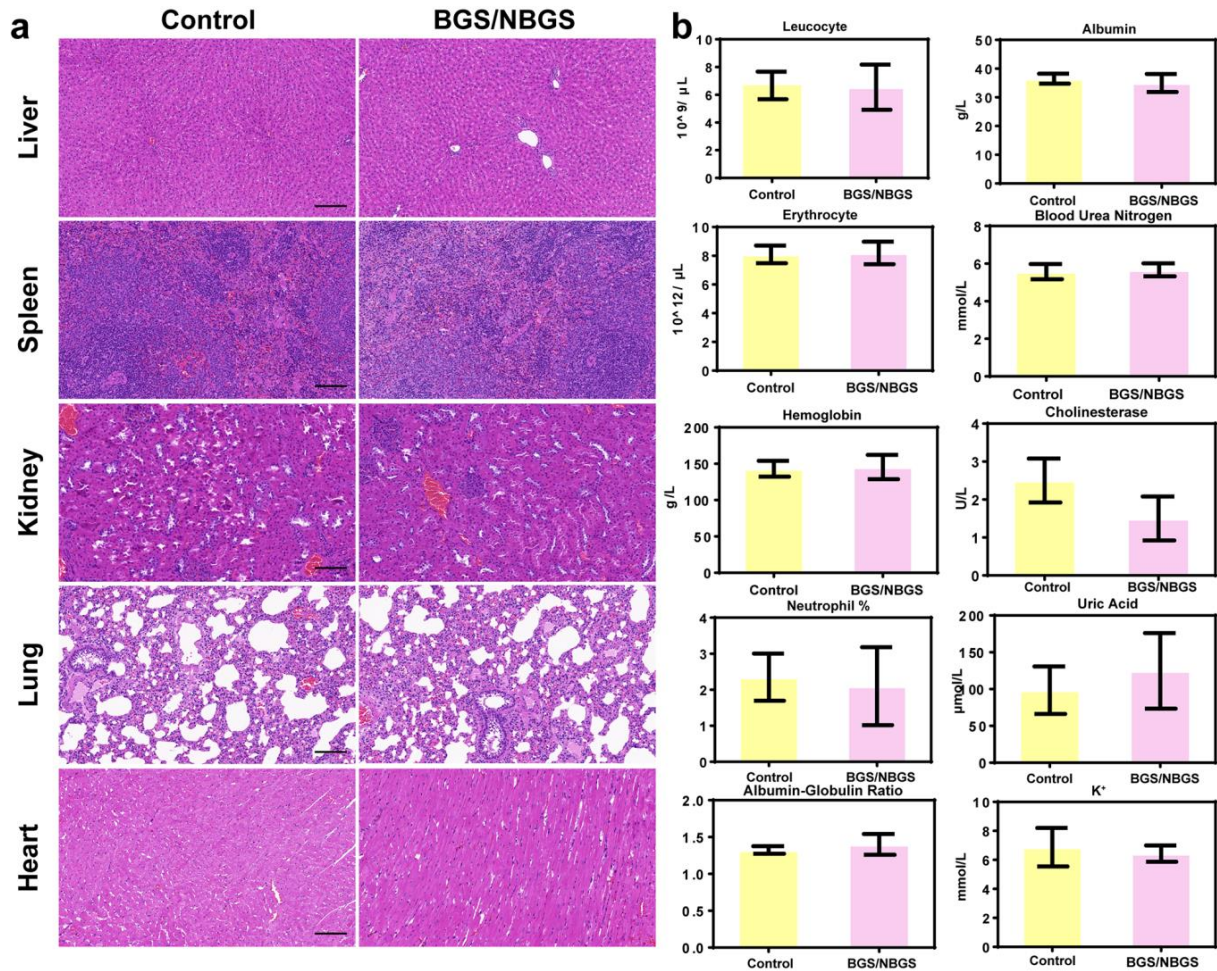

**Fig. S8** **a** H&E staining of major organs from pristine animals (control) and those with BGS/NBGS implantation. There were no significant differences between the two groups. **b** Blood cell count and biochemical analysis of peripheral blood from SD rats with large calvarial defect and BGS/NBGS implantation. The results were compared to the control group. The scale bar represents 100  $\mu\text{m}$ .

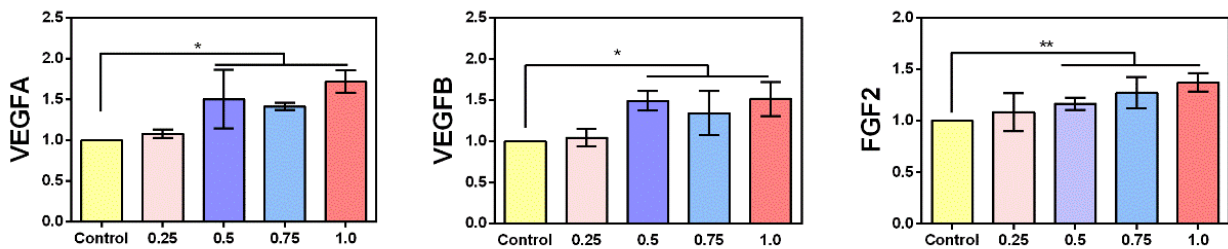

**Fig. S9** Vasculogenesis-related gene expression (*VEGF-A*, *VEGF-B*, and *FGF2*) in HUVECs cultured with different concentration Nb<sub>2</sub>C nanosheets (0, 0.25, 0.5, 0.75, and 1 mg mL<sup>-1</sup>) after 24 h (\* $p < 0.05$ , \*\* $p < 0.01$ , statistically significant)
